# Supplementary material for: GTA: a game theoretic approach to identifying cancer subnetwork markers
Source: Royal Society of Chemistry journal article supplement (doi:10.1039/c5mb00684h), 2015-12-23
Supplement: c5mb00684h1.pdf [file c5mb00684h1.pdf]

## **Supplementary Data**

# **GTA: a Game Theoretic Approach to Identifying Cancer Subnetwork Markers**

**This file contains:**

- **Supplementary Information 1-2**
- **Supplementary Figures 1-5**

# Supplementary Information 1

## A simple example of Nash equilibria

As a simple example of Nash equilibria, suppose there are two players in a game. Player 2 has strategy set  $\Sigma_2 = \{L, M, R\}$  and player 1 has strategy set  $\Sigma_1 = \{U, D\}$  and the payoff matrix is:

|    |          |                      |               |               |
|----|----------|----------------------|---------------|---------------|
|    |          | P2                   |               |               |
|    |          | <i>L</i>             | <i>M</i>      | <i>R</i>      |
| P1 | <i>U</i> | 8, <u>0</u>          | <u>5</u> , -1 | <u>4</u> , -2 |
|    | <i>D</i> | <u>10</u> , <u>1</u> | 4, 0          | 1, -1         |

Assuming players rationality, if player 2 chooses the strategy *U* then the strategy *L* is the best choice for player 1, also if player 2 chooses the strategy *D* then *L* is the best one for player 1. If player 1 chooses strategies *L*, *M* and *R*, then, *D*, *U* and *U* respectively provide the best payoffs for player 2. Finally, the pure Nash equilibria is (*D*, *L*).

## Supplementary Information 2

### GTA Scoring Algorithm

In our game theory approach, a scoring scheme is proposed based on a payoff function as a combination of gain function and loss function which are described in the following. It should be noted that joining or leaving a subnetwork are the main strategies that can be chosen by each player.

**Gain function.** Suppose in a subnetwork  $G_s$ , there are  $|V_s| = n$  proteins corresponding to  $n$  unique genes ( $Genes = \{g_1, g_2, \dots, g_n\}$ ). These genes have expression values for  $m$  different samples in the microarray datasets. The expression vector  $x_i = (x_i^1, x_i^2, \dots, x_i^m)$  contains expression values of gene  $i$ , in which  $i = 1, 2, \dots, n$  and  $x_i^j$  is the expression level of gene  $i$  in sample  $j$ . For considering phenotypes of the samples in their expressions, we compute the log-likelihood ratio (LLR) of each gene that indicates which phenotype is more likely based on a given expression of that gene. The LLR for gene  $g_i$ , for two different phenotypes is defined by

$$LLR_i(x_j^i) = \log \left[ \frac{f_i^1(x_j^i)}{f_i^2(x_j^i)} \right] \quad (1)$$

Where  $f_i^1(x_j^i)$  and  $f_i^2(x_j^i)$  are the conditional probability density function (PDF) of the expression level of gene  $g_i$  under phenotype 1 and phenotype 2 respectively.

A local scoring (LS) function is also defined for each gene  $g_i$ . By this scoring, we try to find the role of each protein in the subnetwork in connecting DEGs. The LS function for gene  $i$  with joining strategy is defined as equation (3), in which  $k$  is the number of neighbor genes of the gene  $i$  in the subnetwork  $G_s$ .

$$LS_i = \sum_{j=1}^k t - score(LLR_{i_j}) \quad (3)$$

Where  $g_{i_1}, g_{i_2}, \dots, g_{i_k}$  are  $k$  neighbors of gene  $g_i$  in the subnetwork.

Furthermore, to score the connectivity of each subnetwork, a density value is assigned. For a subnetwork  $G_s = (V_s, E_s)$ , the density value is defined by:

$$DE(G_s) = \frac{\sum_{e \in E_s} w(e)}{\binom{|V_s|}{2}} \quad (4)$$

Where  $w(e)$  is the weight of edge  $e$  based on Lage's method.

Finally, the gain function (GF) is determined as equation (5) for gene  $i$  in subnetwork  $G_s$ , in which  $\alpha$ ,  $\beta$  and  $\gamma$  are constants.

$$GF(i, G_s) = \alpha.t - score(LLR_i) + \beta.LS_i + \gamma.DE(G_s) \quad (5)$$

In above equation,  $\alpha$ ,  $\beta$  and  $\gamma$  are weighting parameters to imply each function's importance and  $t - score(LLR_i)$  is the t-test statistics score of the  $LLR_i$ .

**Loss function.** The loss function (LF) for gene  $i$  with joining strategy is defined in equation (6), where  $c$  is a constant.

$$LF(i, G_s) = c.(|V_s| - 1) \quad (6)$$

**Payoff function.** Eventually, the payoff function (PF) for a given agent  $i$  and the subnetwork  $G_s$  is calculated as follows:

$$PF(i, G_s) = GF(i, G_s) - LF(i, G_s) \quad (7)$$

By examining different values for constants in payoff function, using numerical method, the most powerful discriminatory subnetworks were achieved by setting  $\alpha = 1.24$ ,  $\beta = 1$ ,  $\gamma = 1$  and  $c = 2$ .

## Supplementary Figure 1. The pseudo-code of the GTA algorithm

**Input:** Weighted PPI Network  $G=(V,E,w)$ , Absolute t-scores of Genes (t-scores), Number of Subnetwork Markers (N)

**Output:** List of Ranked Subnetwork Markers

1. Sort Gene List by Their Absolute t-scores in Decreasing Order ;
2. For  $i=1: N$ 
  - Deg= Degree of Gene  $i$  ;
  - If (Deg  $\geq$  Average Degree of PPIN nodes)
    - ✓ Seed=Gene  $i$  ;
    - ✓ Candidate\_Subnetwork=BFS (Seed, 2) ; //Using Breadth First Search and starting from the seed gene, nodes with at most two interactions away from the seed are returned
    - ✓ Subgames= Divide candidate subnetwork into several subgames;
    - ✓ For each subgame do
      - Payoffs=Calculate the payoff value for each player;
      - Equilibriums=Calculate Nash equilibria;
      - Selected= Choose the best of the Nash equilibria // Based on the average payoff values of associated genes
    - ✓ Optimized\_Subnetwork=Merge all selected equilibria of subgames;
    - ✓ End
  - Subnetwork\_Markers( $i$ )=Optimized subnetwork;
  - End
3. Do Post-processing on each optimized subnetwork markers; // Based on K-means

**Supplementary Figure 2. POLR2J-based subnetwork in the Netherland dataset.**

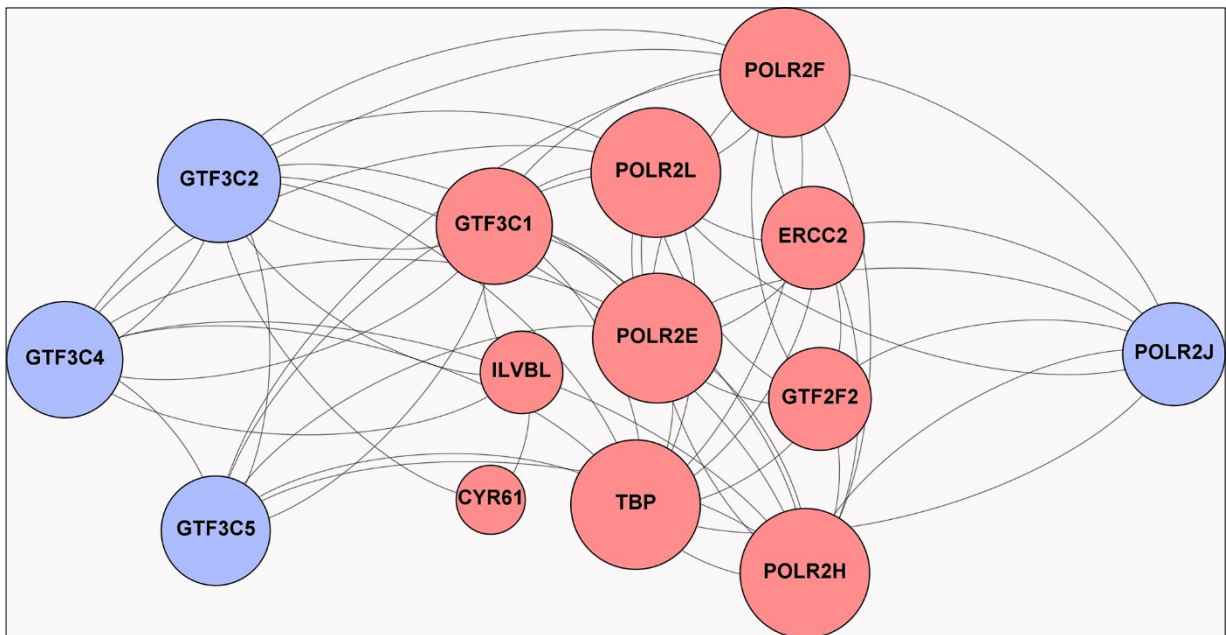

Node colour represents changes in level of expression where red and blue node are DEGs and non-DEGs respectively. Node degree is proportional to the diameter of each node. All of the edges have a confidence-weight of 1.0, indicating high confidence of interactions in the subnetwork.

**Supplementary Figure 3. POLR2J-based subnetwork in the Sweden dataset.**

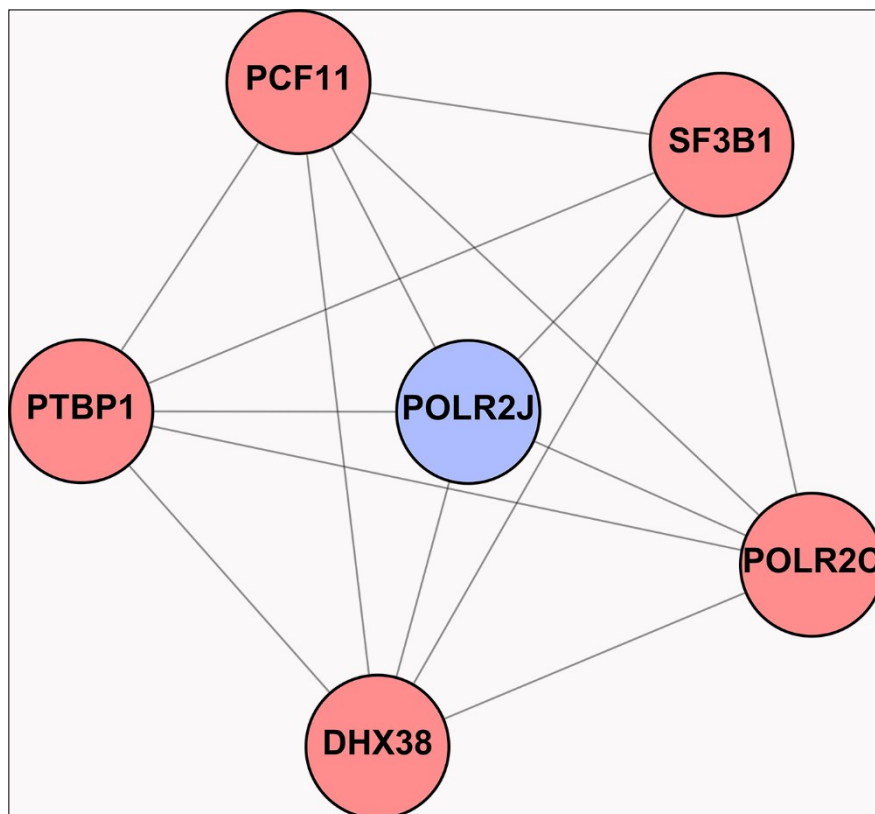

Node colour represents changes in level of expression where red and blue node are DEGs and non-DEGs respectively. Node degree is proportional to the diameter of each node. All of the edges have a confidence-weight of 1.0, indicating high confidence of interactions in the subnetwork.

**Supplementary Figure 4. The average accuracy of within-dataset experiments**

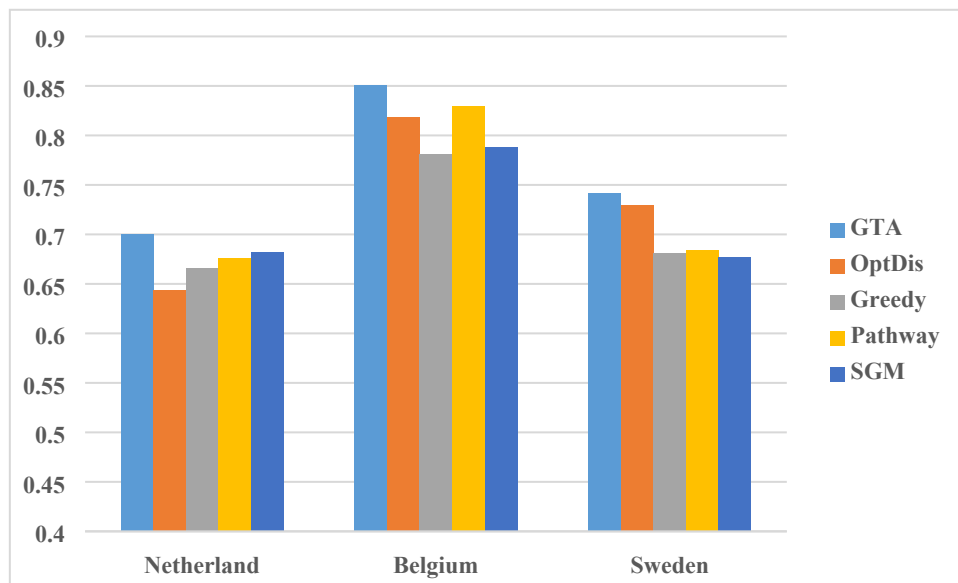

The bar chart shows the results of the within-dataset experiments based on the Netherland, Belgium and Sweden datasets. It shows the average accuracy of the classifier constructed by markers identified by GTA, OptDis method, the greedy method, pathway- and gene-based methods.



**Supplementary Figure 5. The average accuracy of cross-dataset experiments testing reproducibility**

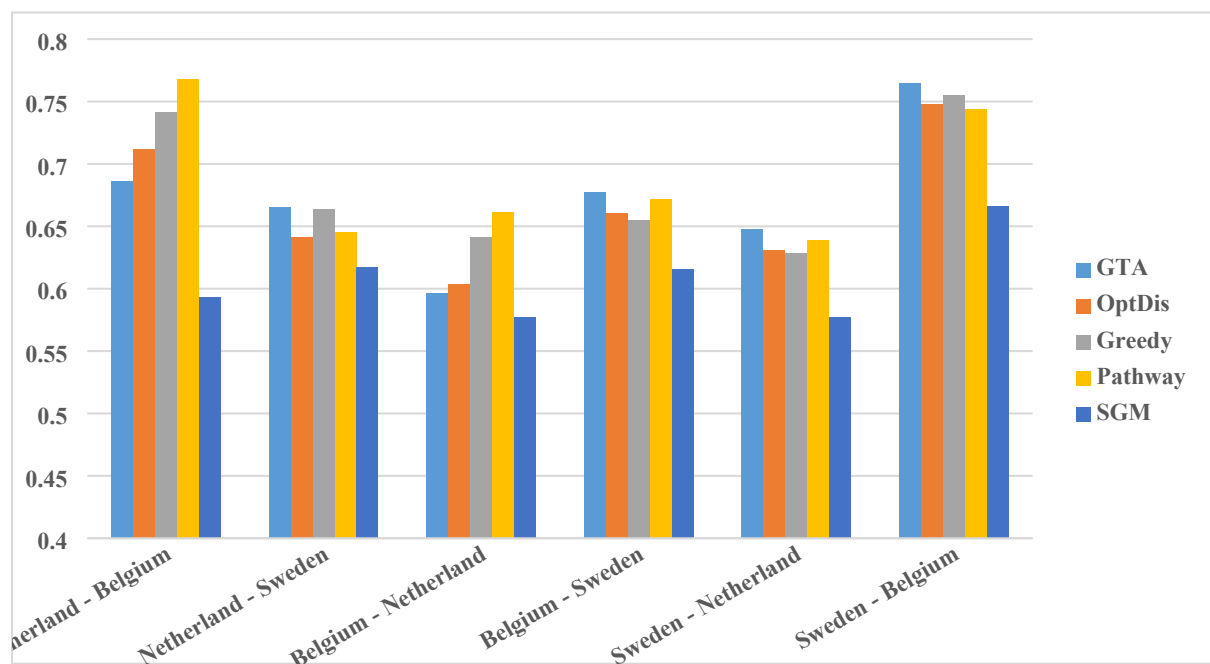

The bar chart shows the average accuracy of the SVM classifier that uses subnetwork markers identified by GTA, OptDis method, the greedy method, pathway- and gene-based methods. In order to evaluate the reproducibility of various markers, we used the first dataset to identify markers and the second dataset to train the classifier.
